# Supplementary material
Source: PubMed Central journal article supplement (PMC4195533)
Supplement: Supp_Fig1.pdf [file Supp_Fig1.pdf]

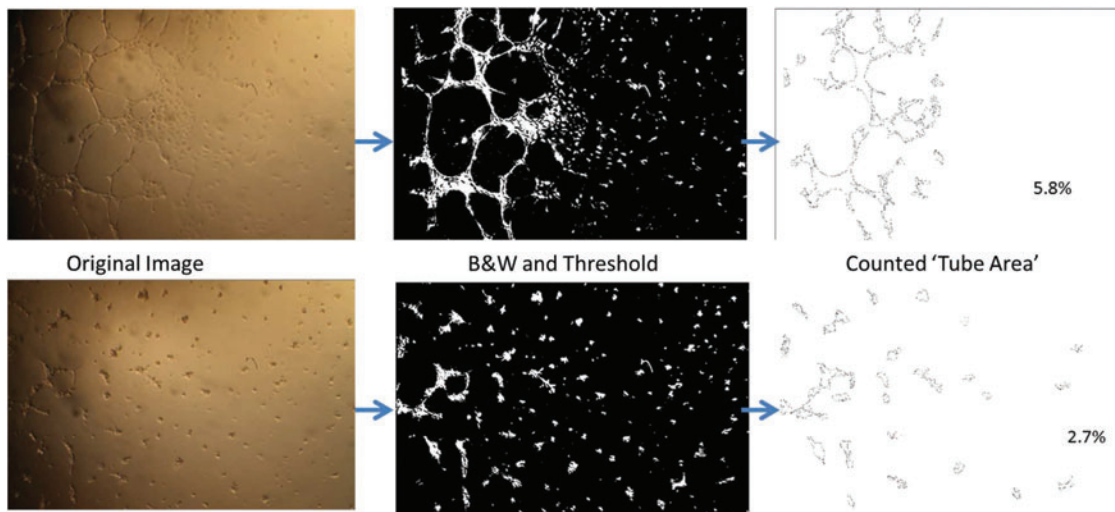

**SUPPLEMENTARY FIG. S1.** Analysis method for quantifying tube area. Images are analyzed using ImageJ. Images are turned into black and white and then thresholded. Images are then analyzed to quantify tube area excluding “particles” below a certain threshold size.
