# Supplementary material
Source: PubMed Central journal article supplement (PMC4195533)
Supplement: Supp_Fig2.pdf [file Supp_Fig2.pdf]

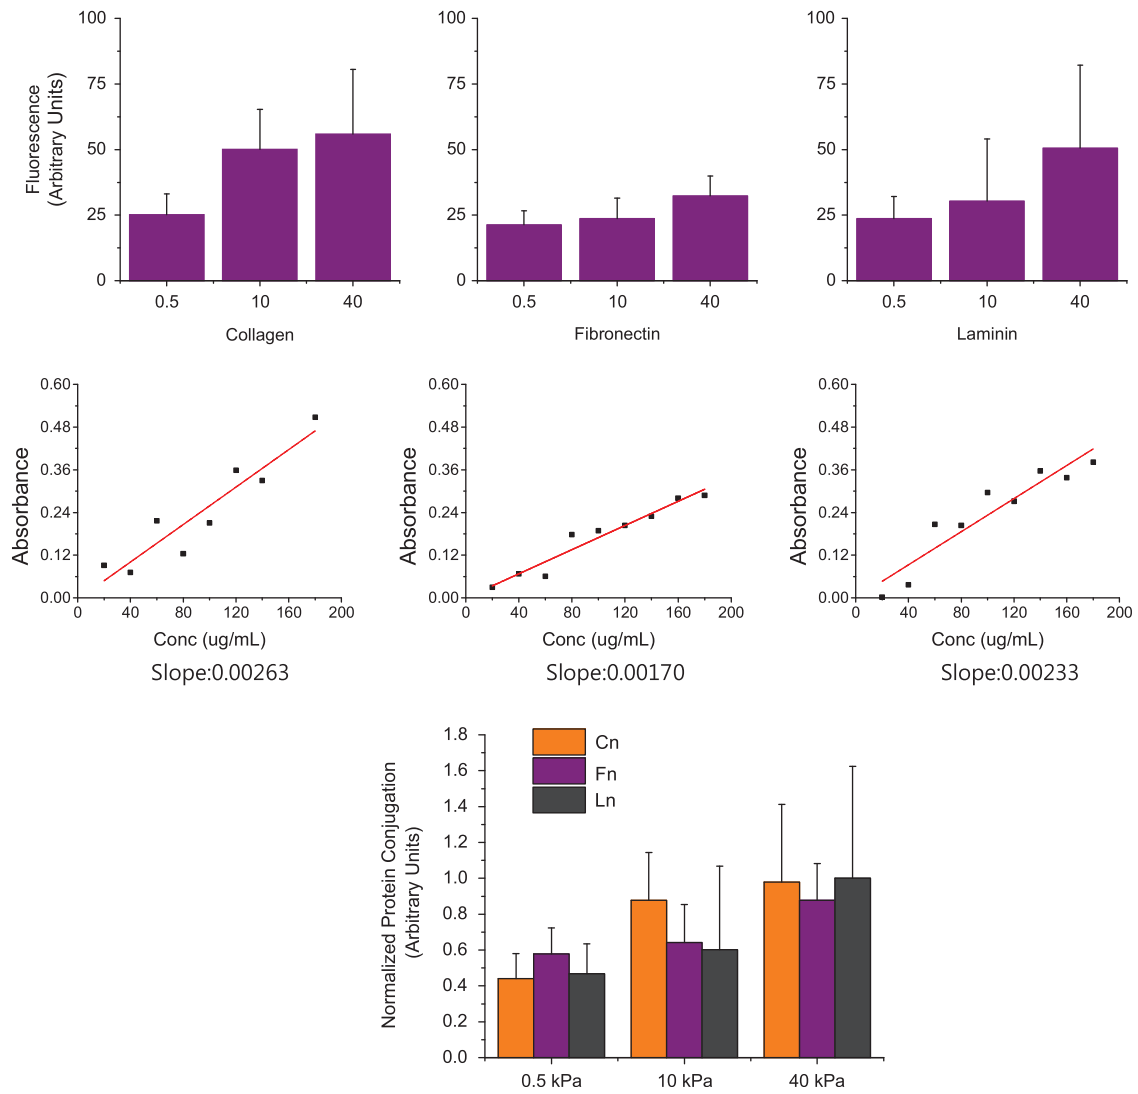

**SUPPLEMENTARY FIG. S2.** Surface fluorescence intensity of fluorescein-isothiocyanate-conjugated proteins to hydrogels of different stiffnesses (top), the corresponding standard curves of these proteins in solution (middle) after subtracting baseline values and surface intensities normalized to standard curve slopes (bottom).
