# Supplementary material
Source: PubMed Central journal article supplement (PMC4195533)
Supplement: Supp_Fig3.pdf [file Supp_Fig3.pdf]

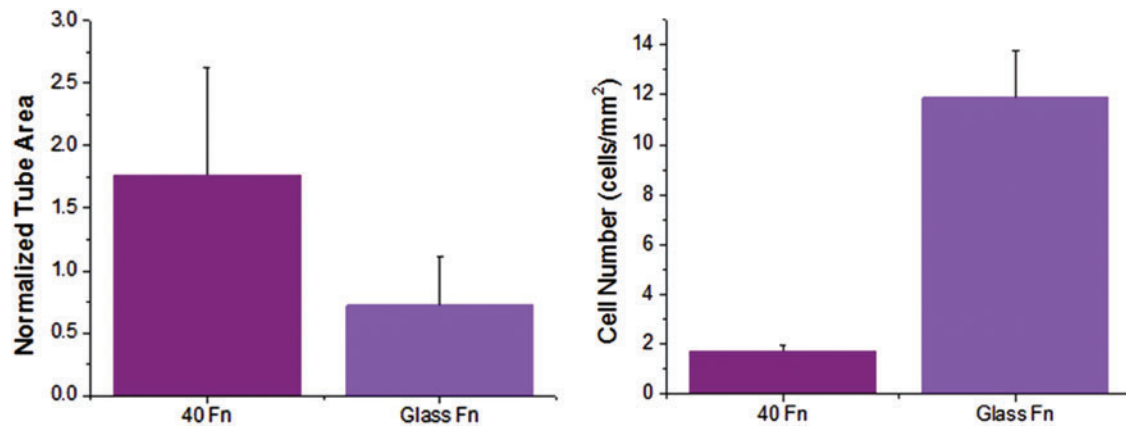

**SUPPLEMENTARY FIG. S3.** Comparing 40-kPa gels to the glass condition showing differences in tubulogenesis and cell numbers.
