# Supplementary material
Source: PubMed Central journal article supplement (PMC4195533)
Supplement: Supp_Fig4.pdf [file Supp_Fig4.pdf]

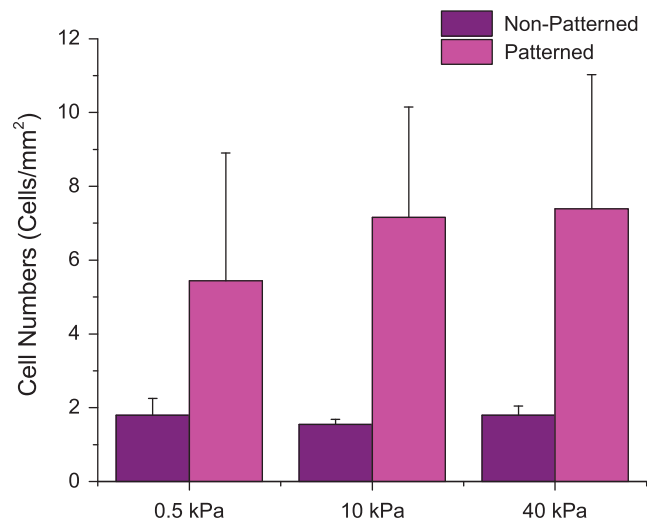

**SUPPLEMENTARY FIG. S4.** Cell numbers across patterned and nonpatterned fibronectin-conjugated gels.
