# Supplementary material
Source: PubMed Central journal article supplement (PMC4195533)
Supplement: Supp_Fig5.pdf [file Supp_Fig5.pdf]

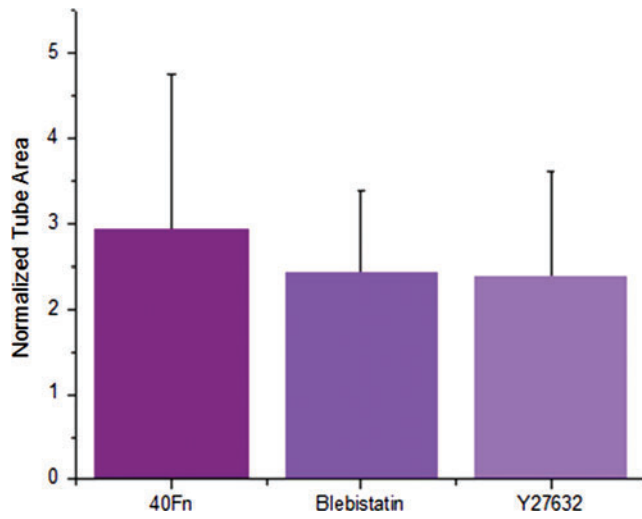

**SUPPLEMENTARY FIG. S5.** Effect of adding drugs that inhibit actomyosin contractility to mesenchymal stem cells on human microvascular endothelial cell (HMVEC) tubulogenesis.
