# Supplementary material
Source: PubMed Central journal article supplement (PMC4195533)
Supplement: Supp_Fig6.pdf [file Supp_Fig6.pdf]

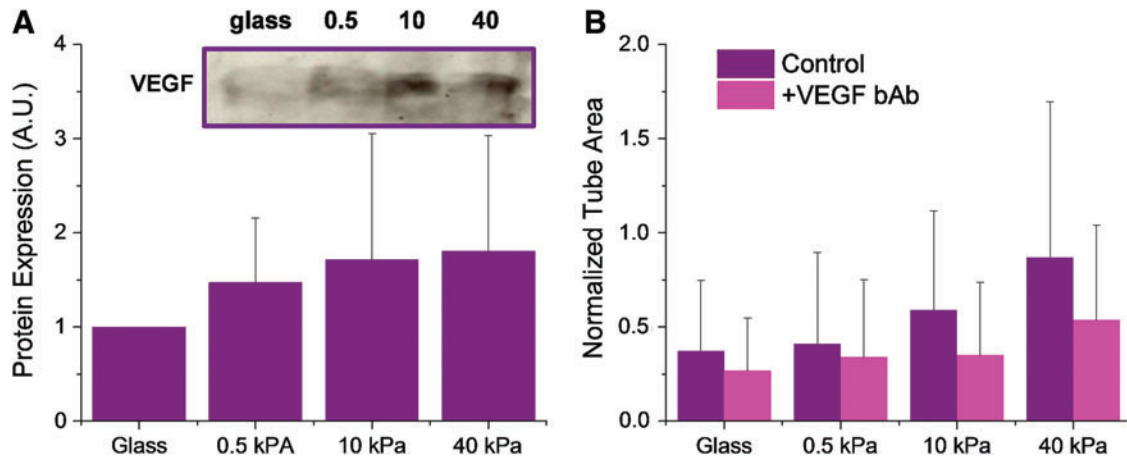

**SUPPLEMENTARY FIG. S6.** (A) Western blotting analysis of vascular endothelial growth factor (VEGF) protein expression in the conditioned media after 4 days relative to the glass condition. Inset shows representative blot. (B) The effect of blocking VEGF in supplemented conditioned media. Adding VEGF-blocking antibody decreases the observed HMVEC tubulogenesis differentially across the conditions. Error bars represent standard deviation from three replicates ( $n=3$ ).
