# Supplementary material
Source: PubMed Central journal article supplement (PMC4195533)
Supplement: Supp_Table1.pdf [file Supp_Table1.pdf]

## Supplementary Data

SUPPLEMENTARY TABLE S1. POLYMERASE CHAIN REACTION PRIMERS USED

| <i>Marker</i> | <i>Forward</i>             | <i>Reverse</i>                |
|---------------|----------------------------|-------------------------------|
| GAPDH         | CTC TGC TCC TCC TGT TCG AC | GTT TCT CTC CGC CCG TCT TC    |
| VEGF          | CTG CTG TCT TGG GTG CAT TG | GGC ACG ACC GCT TAC CTT       |
| Angiogenin    | GCA GCG AAT AAG TAC GTG GC | CAG AGA CTA CCC CTG GCT GA    |
| IL-8          | ACC GGA AGG AAC CAT CTC AC | CGC TGT AGG TCA GAA AGA TGT G |
| IL-6          | GTCAGGGGTGGTTATTGCAT       | AGTGAGGAACAAGCCAGAGC          |
| HGF           | CCCTGTAGCCTTCTCCTTGA       | CGCTGGGAGTACTGTGCAAT          |
| IGF           | TCATCCACGATGCCTGTCT        | TGGATGCTCTTCAGTTCGTG          |
| EGF           | TGGTTCCTTCTGTGTCAATCC      | GTACTCTCGCAGGAAATGGG          |
| Timp-1        | GCC TGT CTA CTC AGC TTG GC | TTG GGA AAG CAG TTC CAG CC    |
| Timp-2        | ATG TCC AGA ACC CGG CAA TG | TTC CCT GCA GGT TAG ACC CC    |

EGF, epidermal growth factor; HGF, hepatocyte growth factor; IGF, insulin-like growth factor; IL, interleukin, VEGF, vascular endothelial growth factor.
