# Supplementary material
Source: PubMed Central journal article supplement (PMC4195533)
Supplement: Supp_Table2.pdf [file Supp_Table2.pdf]

SUPPLEMENTARY TABLE S2. COMPONENTS ADDED  
TO THE CELL CULTURE MEDIUM  
IN THE POSITIVE CONTROLS

| <i>Component</i> | <i>Concentration (%)</i> |
|------------------|--------------------------|
| FBS              | 2                        |
| hFGF-2           | 0.40                     |
| VEGF             | 0.10                     |
| IGF-1            | 0.10                     |
| hEGF             | 0.10                     |
| Hydrocortisone   | 0.04                     |
| Ascorbic acid    | 0.10                     |
| Heparin          | 0.10                     |
| GA-100           | 0.10                     |

FBS, fetal bovine serum; hFGF-2, human fibroblast growth factor 2; IGF-1, insulin-like growth factor 1; hEGF, human epidermal growth factor.
